# Supplementary material
Source: publisher figshare collection journal article supplement (https://acs.figshare.com/ndownloader/files/9969634)
Supplement: Supplementary file 1 [file 9969634]

## Supporting information

### **Pyridine-Functionalized and Metallized Meso-Macroporous Polymers for Highly Selective Capture and Catalytic Conversion of CO<sub>2</sub> into Cyclic Carbonates**

Qin Wu<sup>†</sup>, Kuan Huang<sup>&</sup>, Fujian Liu<sup>\*†</sup>, Pengfei Zhang<sup>\*§</sup> and Lilong Jiang<sup>\*†</sup>

<sup>†</sup> *National Engineering Research Center of Chemical Fertilizer Catalyst (NERC-CFC), School of Chemical Engineering, Fuzhou University, Gongye Road No.523, Fuzhou 350002, Fujian, PR China. E-mail: [fliu1982@gmail.com](mailto:fliu1982@gmail.com), [jll@fzu.edu.cn](mailto:jll@fzu.edu.cn)*

<sup>‡</sup> *College of Chemistry and Chemical Engineering, Shaoxing University, Shaoxing, 312000, China.*

<sup>§</sup> *School of Chemistry and Chemical Engineering, Shanghai Jiao Tong University, Shanghai 200240, China. E-mail: [chemistryzpf@sjtu.edu.cn](mailto:chemistryzpf@sjtu.edu.cn)*

<sup>&</sup> *Key Laboratory of Poyang Lake Environment and Resource Utilization of Ministry of Education, School of Resources Environmental and Chemical Engineering, Nanchang University, Nanchang 330031, China.*

*\*Correspondence concerning this article should be addressed to [fliu1982@gmail.com](mailto:fliu1982@gmail.com), [jll@fzu.edu.cn](mailto:jll@fzu.edu.cn)*

**Table S1** A summary of CO<sub>2</sub> selective capture property on different porous polymers reported in the literature.

| Samples         | CO <sub>2</sub> capacities at 0 °C<br>(mmol/g) 0.15 bar | References                                                 |
|-----------------|---------------------------------------------------------|------------------------------------------------------------|
| Co@PDVB-VP-0.25 | 0.89                                                    | <b>This work</b>                                           |
| Co@PDVB-VP-0.5  | 0.82                                                    | <b>This work</b>                                           |
| Co@PDVB-VP-1.0  | 0.58                                                    | <b>This work</b>                                           |
| PINK            | 1.15                                                    | <i>J. Mater. Chem. A</i> , <b>2016</b> , 4,<br>2517-2523   |
| CPP             | 1.50                                                    | <i>J. Mater. Chem. A</i> , <b>2015</b> , 3,<br>10284-10288 |
| PIN1            | 0.79                                                    | <i>J. Mater. Chem. A</i> , <b>2015</b> , 3,<br>18492-18504 |
| TPI-2@IC        | 0.85                                                    | <i>J. Mater. Chem. A</i> , <b>2015</b> , 3,<br>878-885     |
| PP1-2-tren      | 1.47                                                    | <i>J. Mater. Chem. A</i> , <b>2015</b> , 3,<br>16229-16234 |
| A1B1-0.030      | 1.12                                                    | <i>J. Mater. Chem. A</i> , <b>2015</b> , 3,<br>10990-10998 |
| NAN-2           | 0.61                                                    | <i>J. Mater. Chem. A</i> , <b>2016</b> , 4,<br>8190-8197   |
| PPN-81          | 1.22                                                    | <i>J. Mater. Chem. A</i> <b>2015</b> , 3,                  |



**Table S2** A summary of CO<sub>2</sub>/N<sub>2</sub> selectivities on different porous polymers reported in the literature

| Porous materials                                          | Temperature (°C) | Method      | CO <sub>2</sub> /N <sub>2</sub> selectivities | Refs.                                               |
|-----------------------------------------------------------|------------------|-------------|-----------------------------------------------|-----------------------------------------------------|
| Cu/BF <sub>4</sub> /BIPLP-1                               | 25               | Henry's law | 64                                            | <i>J. Phys. Chem. C</i> <b>2015</b> , 119, 8174     |
| COP-19                                                    | 25               | IAST        | 131                                           | <i>Faraday Discuss.</i> <b>2015</b> , 183, 401      |
| Azo-COP-2                                                 | 25               | IAST        | 110                                           | <i>Nat Commun</i> <b>2013</b> , 4, 1357             |
| TB-COP-1                                                  | 25               | IAST        | 69                                            | <i>J. Mater. Chem. A</i> <b>2014</b> , 2, 12507     |
| PPN-6-SO <sub>3</sub> Li                                  | 22               | IAST        | 414                                           | <i>J. Am. Chem. Soc.</i> <b>2011</b> , 133, 18126   |
| PPN-6-SO <sub>3</sub> NH <sub>4</sub>                     | 22               | Henry's law | 196                                           | <i>Energ. Environ. Sci.</i> <b>2013</b> , 6, 3559   |
| PPN-6-DETA                                                | 22               | IAST        | 442                                           | <i>Angew. Chem. Int. Ed.</i> <b>2012</b> , 51, 7480 |
| PPN-81                                                    | 25               | IAST        | 4716                                          | <i>J. Mater. Chem. A</i> <b>2015</b> , 3, 3252      |
| PFPOP-3                                                   | 25               | IAST        | 57                                            | <i>RSC Adv.</i> <b>2015</b> , 5, 71095              |
| DA-CMP-1                                                  | 25               | IAST        | 60                                            | <i>J. Mater. Chem. A</i> <b>2015</b> , 3, 21185     |
| TB-MOP                                                    | 25               | Henry's law | 51                                            | <i>ACS Macro. Lett.</i> <b>2013</b> , 2, 660        |
| PAF-3                                                     | 25               | Henry's law | 87                                            | <i>Energ. Environ. Sci</i> <b>2011</b> , 4, 3991    |
| PAF-33-NH <sub>2</sub>                                    | 25               | Henry's law | 80                                            | <i>Polymer Chem.</i> <b>2014</b> , 5, 2266          |
| [HO <sub>2</sub> C] <sub>100%</sub> -H <sub>2</sub> P-COF | 25               | IAST        | 77                                            | <i>Angew. Chem. Int. Ed.</i> <b>2015</b> , 54, 2986 |
| CPP                                                       | 25               | Henry's law | 94                                            | <i>J. Mater. Chem. A</i>                            |

|                                      |           |             |              |                                                      |
|--------------------------------------|-----------|-------------|--------------|------------------------------------------------------|
|                                      |           |             |              | <b>2015</b> , 3, 10284                               |
| om-ph-MR                             | 25        | Henry's law | 100          | <i>J. Am. Chem. Soc.</i> <b>2015</b> , 137, 7210     |
| SNW-1                                | 25        | IAST        | 50           | <i>Adv. Mater.</i> <b>2014</b> , 26, 3644            |
| TCPF-4                               | 25        | Henry's law | 56           | <i>Polymer Chem.</i> <b>2015</b> , 6, 7410           |
| TBMID                                | 25        | Henry's law | 59           | <i>RSC Adv.</i> <b>2015</b> , 5, 100322              |
| FCTF-1                               | 25        | IAST        | 31           | <i>Energy Environ. Sci.</i> , <b>2013</b> , 6, 3684. |
| [Cu(tba) <sub>2</sub> ] <sub>n</sub> | 25        | IAST        | 45           | <i>J. Am. Chem. Soc.</i> <b>2014</b> , 136, 10906.   |
| <b>Co@PDVB-VP-1.0</b>                | <b>25</b> | <b>IAST</b> | <b>163.5</b> | <b>This work</b>                                     |
| <b>Co@PDVB-VP-0.5</b>                | <b>25</b> | <b>IAST</b> | <b>144.5</b> | <b>This work</b>                                     |

---

**Table S3** Catalytic activity of different catalysts for cycloaddition of CO<sub>2</sub> to produce propylene carbonate.

| Catalyst                             | CO <sub>2</sub> (MPa)                           | Co-catalysts                  | Temp. (°C) | Time (h) | Yield (%) | Refs                                                    |
|--------------------------------------|-------------------------------------------------|-------------------------------|------------|----------|-----------|---------------------------------------------------------|
| Co@PDVB-VP-0.5                       | 1.0(CO <sub>2</sub> /N <sub>2</sub> =0.15/0.85) | <i>n</i> -Bu <sub>4</sub> NBr | 30         | 48       | 99.2      | <b>This work</b>                                        |
| Co@PDVB-VP-0.5                       | 1.0(CO <sub>2</sub> /N <sub>2</sub> =0.15/0.85) | <i>n</i> -Bu <sub>4</sub> NBr | 100        | 0.75     | 98.9      | <b>This work</b>                                        |
| USTC-253-TF A                        | 0.1                                             | <i>n</i> -Bu <sub>4</sub> NBr | 25         | 72       | 81.3      | <i>ChemSusChem</i> , <b>2015</b> , 8, 878-885.          |
| Co-CMP 100                           | 0.1                                             | <i>n</i> -Bu <sub>4</sub> NBr | 25         | 48       | 81.5      | <i>Nat. Commun.</i> , <b>2014</b> , 4, 1960.            |
| Co/POP-TPP                           | 0.1                                             | <i>n</i> -Bu <sub>4</sub> NBr | 29         | 24       | 98.5      | <i>J. Catal.</i> , <b>2016</b> , 338, 202.              |
| Zn/HAzo-POP-1                        | 3.0                                             | <i>n</i> -Bu <sub>4</sub> NBr | 100        | 0.5      | 86.0      | <i>Angew. Chem., Int. Ed.</i> , <b>2016</b> , 55, 9685. |
| Cu/POP-Bpy                           | 0.1                                             | <i>n</i> -Bu <sub>4</sub> NBr | 29         | 48       | 99.0      | <i>ChemSusChem</i> , <b>2017</b> , 10, 1186.            |
| Silicon-based poly-imidazolium salts | 1.0                                             | -                             | 110        | 2        | 94.0      | <i>Green Chem.</i> , <b>2014</b> , 16, 4515             |
| Chitosan                             | 2.0                                             | -                             | 120        | 4        | 96.0      | <i>Green Chem.</i> ,                                    |

---

|                |     |                              |     |     |      |                        |                       |
|----------------|-----|------------------------------|-----|-----|------|------------------------|-----------------------|
| functionalized |     |                              |     |     |      |                        | <b>2012</b> , 14, 654 |
| ionic liquid   |     |                              |     |     |      |                        |                       |
| CS-EMImBr      |     |                              |     |     |      |                        |                       |
| Co@R/HMTA-     | 1.0 | <i>n</i> -Bu <sub>4</sub> NB | 100 | 1.5 | 97.1 | <i>Adv. Mater.</i> ,   |                       |
| 0.30           |     | r                            |     |     |      | <b>2017</b> ,          | 29,                   |
|                |     |                              |     |     |      |                        | 1700445.              |
| TBB-Bpy@Sal    | 1.0 | -                            | 60  | 6   | 99.2 | <i>Chem. Eur. J.</i> , |                       |
| en-Co          |     |                              |     |     |      | <b>2016</b> ,          | 22, 8368.             |

---

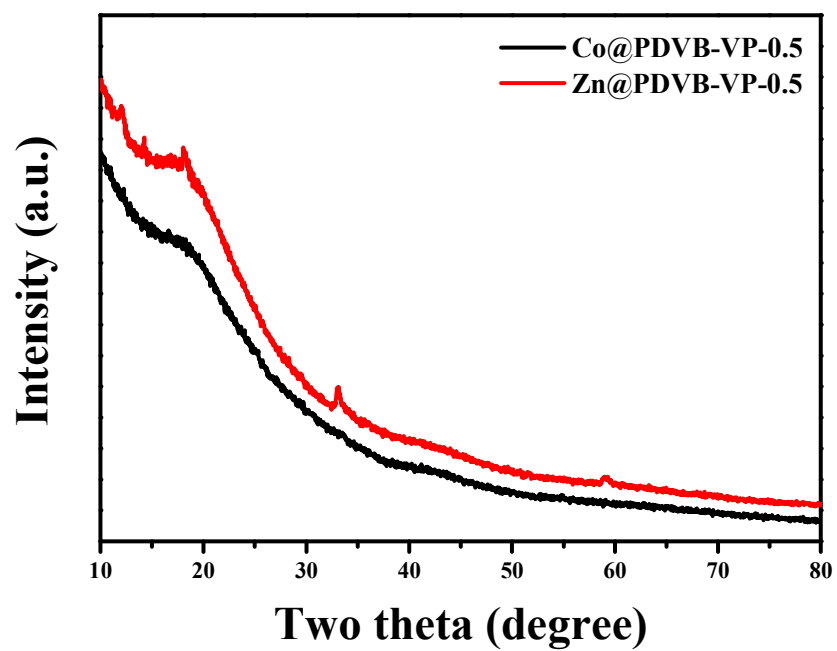

**Figure S1** Wide angle XRD patterns of Co@PDVB-VP-0.5 (black) and Zn@PDVB-VP-0.5 (red).



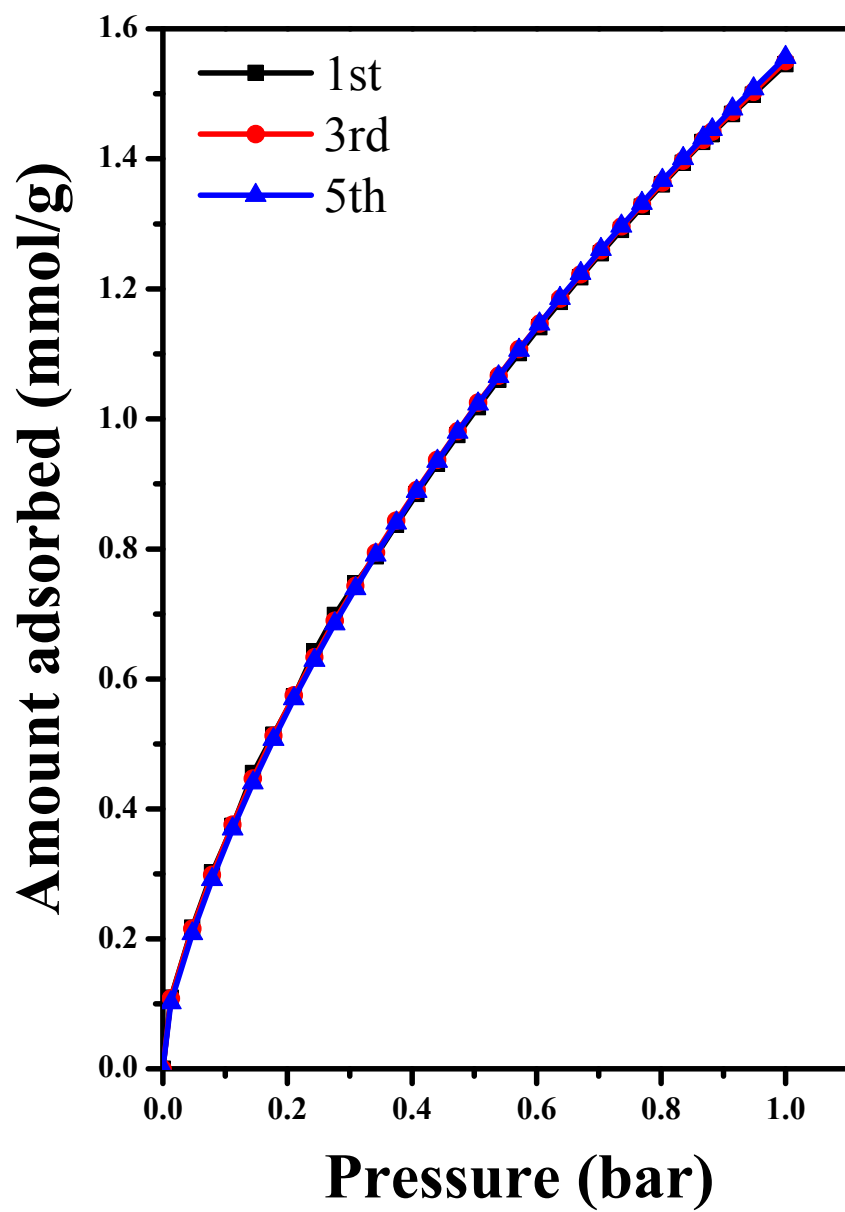

**Figure S2** The reuse study of Zn@PDVB-VP-0.5 in the selective capture of CO<sub>2</sub> at 0 °C.

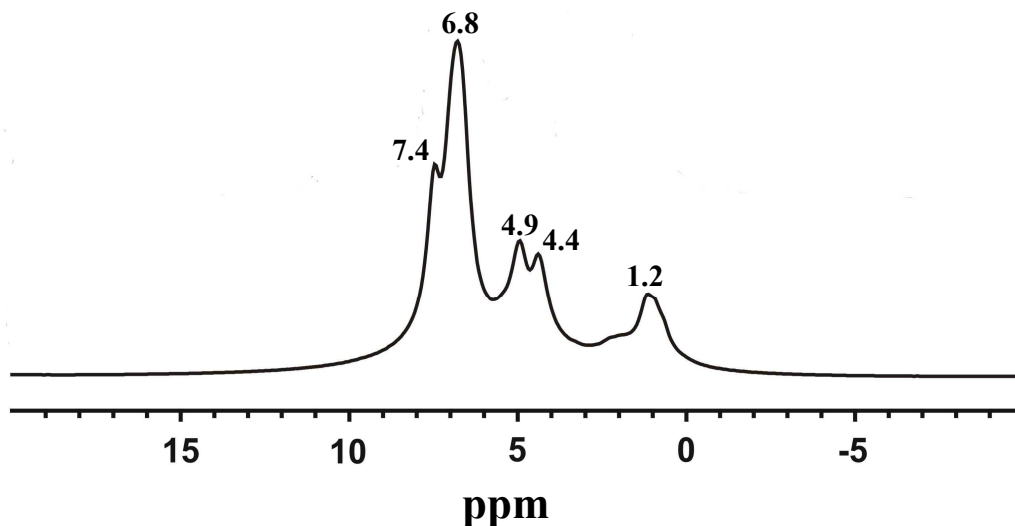

**Figure S3**  $^1\text{H}$  solid state NMR spectra of pyrrole adsorbed on Co@PDVB-VP-0.5.

The basic strength of Co@PDVB-VP-0.5 was investigated by using solid-state  $^1\text{H}$  NMR technique involving pyrrole as the probe molecule (Figure S3), which is frequently used to investigate the basic properties of solid catalysts, mainly because of the hydrogen-bonding interaction between the NH group of pyrrole and the basic sites in catalysts. The solid-state  $^1\text{H}$  NMR technique is a reliable and *state-of-the-art* approach to determine the basic strength of various kinds of solid base catalysts<sup>S1-S4</sup>. Notably, Co@PDVB-VP-0.5 shows multiple  $^1\text{H}$  resonance peaks centered at around 1.2, 4.4, 4.9, 6.8 and 7.4 ppm, which indicates the presence of variously basic sites with different basic strength in the sample. The peak at around 1.2 ppm may be assigned to the signals of physical absorbed pyrrole in Co@PDVB-VP-0.5. The resonances at around 4.4 and 4.9 ppm can be attributed to absorbed pyrrole on the pyridinic sites, which partially coordinate with  $\text{Co}^{2+}$ , further resulting in relatively weak basic strength. The strong peaks at around 6.8 and 7.4 ppm should be attributed to the absorbed pyrrole on exposed pyridinic sites, which show relatively strong basic

strength and confined inside different environments. The base property of Co@PDVB-VP-0.5 was in the range of medium strength <sup>S1-S6</sup>, which results in its competitive property for the selective capture of CO<sub>2</sub>.

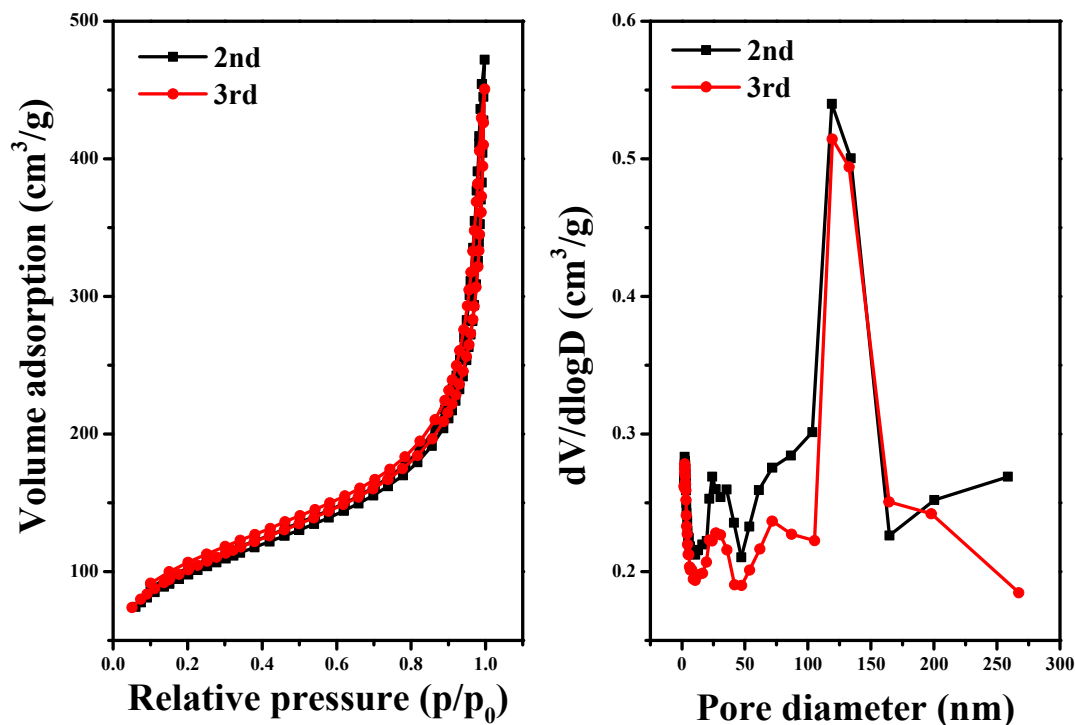

**Figure S4** N<sub>2</sub> isotherms and pore size distribution of recycled Co@PDVB-VP-0.5 for (black) two and (red) three times.

Figure S4 showed N<sub>2</sub> isotherms and pore size distribution of recycled Co@PDVB-VP-0.5 (two and three times recycling) in catalyzing conversion of CO<sub>2</sub>. Compared with fresh Co@PDVB-VP-0.5, the obvious changes of isotherms and nanopore sizes of recycled Co@PDVB-VP-0.5 can not be observed (Figure 1). In addition, fresh Co@PDVB-VP-0.5 shows the BET surface area and pore volume at 479 m<sup>2</sup>/g and 0.61 cm<sup>3</sup>/g, and nearly no decreasing of BET surface areas and pore volumes for the 2<sup>nd</sup> (482 m<sup>2</sup>/g, 0.63 cm<sup>3</sup>/g) and 3<sup>rd</sup> (476 m<sup>2</sup>/g, 0.60 cm<sup>3</sup>/g) recycled Co@PDVB-VP-0.5. The above results confirm very stable porous structure of Co@PDVB-VP-0.5, which was very important for it used as stable and reusable catalysts for the capture and conversion of CO<sub>2</sub>.

## References

- (S1) Sánchez-Sánchez, M.; Blasco, T. Investigation on the nature of the adsorption sites of pyrrole in alkali-exchanged zeolite Y by nuclear magnetic resonance in combination with infrared spectroscopy. *J. Am. Chem. Soc.*, **2002**, *124* (13), 3443–3456.
- (S2) Lavalley, J. C. Infrared spectrometric studies of the surface basicity of metal oxides and zeolites using adsorbed probe molecules. *Catal. Today*, **1996**, *27*, 377–401.
- (S3) Wang, Y.; Han, X. W.; Ji, A.; Shi, L. Y.; Hayashi, S. Basicity of potassium-salt modified hydrotalcite studied by  $^1\text{H}$  MAS NMR using pyrrole as a probe molecule. *Micro. Meso. Mater.*, **2005**, *77*, 139–145.
- (S4) Yi, X. F.; Li, G. C.; Huang, L.; Chu, Y. Y.; Liu, Z. Q.; Xia, H. Q.; Zheng, A. M.; Deng, F. An NMR Scale for Measuring the Base Strength of Solid Catalysts with Pyrrole Probe: A Combined Solid-State NMR Experiment and Theoretical Calculation Study. *J. Phys. Chem. C*, **2017**, *121*, 3887–3895
- (S5) Zheng, A. M.; Li, S.; Liu, S. B.; Deng, F. Acidic Properties and Structure-Activity Correlations of Solid Acid Catalysts Revealed by Solid-State NMR Spectroscopy. *Acc. Chem. Res.*, **2016**, *49*, 655–663.
- (S6) Zheng, A. M.; Liu, S. B.; Deng, F.  $^{31}\text{P}$  NMR Chemical Shifts of Phosphorus Probes as Reliable and Practical Acidity Scales for Solid and Liquid Catalysts, **2017**, *Chem. Rev.*, 10.1021/acs.chemrev.7b00289.
